# Supplementary material for: Biomass Waste Utilization as Nanocomposite Anodes through Conductive Polymers Strengthened SiO2/C from Streblus asper Leaves for Sustainable Energy Storages
Source: MDPI journal article supplement (doi:10.3390/polym16101414), 2024-05-16
Supplement: s1 [file s1]

# Supporting Information

## Biomass Waste Utilization as Nanocomposite Anodes through Conductive Polymers Strengthened SiO<sub>2</sub>/C from *Streblus asper* Leaves for Sustainable Energy Storages

Thanapat Autthawong <sup>1,2,3</sup>, Natthakan Ratsameetammajak <sup>2,4</sup>, Kittiched Khunpakdee <sup>2,4</sup>, Mitsutaka Haruta <sup>5</sup>, Torranin Chairuangstri <sup>6</sup> and Thapanee Sarakonsri <sup>2,3,4,\*</sup>

**Table S1.** Average specific capacity at various rates of current density and the percentage of retention at 0.1C of prepared electrodes.

| Current density (C-rate)     | Average specific capacity (mAh g <sup>-1</sup> ) |                          |                              |
|------------------------------|--------------------------------------------------|--------------------------|------------------------------|
|                              | Nano-SiO <sub>2</sub>                            | Nano-SiO <sub>2</sub> /C | PPy@Nano-SiO <sub>2</sub> /C |
| 0.1C                         | 60                                               | 403                      | 879                          |
| 0.2C                         | 49                                               | 347                      | 737                          |
| 0.3C                         | 44                                               | 311                      | 663                          |
| 0.5C                         | 37                                               | 274                      | 571                          |
| 1.0C                         | 26                                               | 218                      | 455                          |
| 0.1C                         | 59                                               | 381                      | 906                          |
| % Capacity retention at 0.1C | 98%                                              | 95%                      | 103%                         |

**Table S2.** Comparison of the specific capacity and cycle performance of SiO<sub>2</sub>-based composites with carbon and polymer materials as anode materials in LIBs Materials

| Anode materials in LIBs                                                   | Year | Silica source              | Silica content (wt.%) | Battery cycling performance           |                                          |                  | Ref.      |
|---------------------------------------------------------------------------|------|----------------------------|-----------------------|---------------------------------------|------------------------------------------|------------------|-----------|
|                                                                           |      |                            |                       | Current density (mA g <sup>-1</sup> ) | Specific capacity (mAh g <sup>-1</sup> ) | Number cycle (N) |           |
| <i>SiO<sub>2</sub>-based composites with carbon</i>                       |      |                            |                       |                                       |                                          |                  |           |
| 3D interconnected network SiO <sub>2</sub> -C/NCs                         | 2016 | Bamboo leaf                | ~51                   | 200                                   | 294                                      | 180              | 68        |
| SiO <sub>2</sub> @graphite composites                                     | 2017 | Sewage Sludge              | -                     | 100<br>1000                           | 433<br>244                               | 100<br>500       | 69        |
| SiO <sub>2</sub> nanoparticles embedded carbon matrix                     | 2017 | APTES                      | ~40%                  | 100<br>200                            | 888<br>547                               | 100<br>10        | 70        |
| SiO <sub>2</sub> /C/graphene spheres                                      | 2017 | TEOS                       | 43%                   | 50                                    | 605                                      | 100              | 71        |
| Yolk structure porous C/SiO <sub>2</sub> /C                               | 2018 | TEOS                       | ~68%                  | 50<br>300                             | 1027<br>400                              | 80<br>10         | 72        |
| Carbon coated SiO <sub>2</sub>                                            | 2019 | Diatomic frustules         | ~54%                  | 200                                   | 600                                      | 50               | 73        |
| Yolk-shell silica@carbon frameworks                                       | 2019 | TEOS                       | ~57%                  | 100<br>500                            | 630<br>373                               | 150<br>1000      | 74        |
| SiO <sub>2</sub> nanoparticles/ carbon plate                              | 2020 | Rice husk                  | -                     | 100                                   | 176                                      | 100              | 75        |
| C/SiO <sub>2</sub> composites                                             | 2020 | Rice husk                  | ~38%                  | 100                                   | 420                                      | 100              | 76        |
| Carbon coated ball milled SiO <sub>2</sub>                                | 2020 | Diatomaceous earth         | ~87%                  | 100                                   | 840                                      | 100              | 77        |
| Hierarchically porous SiO <sub>2</sub> /N-doped carbon                    | 2020 | Rice husk                  | -                     | 100                                   | 780                                      | 100              | 78        |
| SiO <sub>2</sub> @graphene-like carbon nanocomposites                     | 2021 | Corn cob core              | ~19%                  | 200                                   | 125                                      | 200              | 79        |
| SiO <sub>2</sub> nanotubes coated N-doped carbon layers                   | 2021 | TEOS                       | ~65%                  | 100<br>200                            | 781<br>680                               | 200<br>10        | 80        |
| Carbon-coated SiO <sub>2</sub> /C composites                              | 2022 | Rice husk                  | ~55%                  | 100                                   | 520                                      | 100              | 81        |
| SiO <sub>2</sub> /N-doped graphene nanocomposites                         | 2022 | Rice husk                  | ~10%                  | 288 (C/3)                             | 385                                      | 150              | 82        |
| <i>SiO<sub>2</sub>-based composites with polymer</i>                      |      |                            |                       |                                       |                                          |                  |           |
| Hollow triple shelled SiO <sub>2</sub> /TiO <sub>2</sub> /PPy nanospheres | 2014 | TEOS                       | ~2%                   | 44                                    | 433                                      | 50               | 83        |
| PPy coated on SiO <sub>2</sub> encapsulated porous carbon nanofibers      | 2021 | TEOS                       | ~20%                  | 500                                   | 300                                      | 300              | 84        |
| SiO <sub>2</sub> @cPANI/cTOCNFs                                           | 2022 | Nanosilica                 | ~59%                  | 100<br>1000                           | 1103<br>302                              | 200<br>1000      | 85        |
| PANI-coated nano-silica@rGO                                               | 2022 | Rice husk                  | ~6%                   | 400                                   | 680                                      | 500              | 86        |
| Polypyrrole/SnO <sub>2</sub> @SiO <sub>2</sub>                            | 2022 | TEOS                       | -                     | 0.1C                                  | 676                                      | 100              | 41        |
| SiO <sub>2</sub> -rGO@PPy                                                 | 2022 | Rice husk                  | ~17%                  | 100                                   | 523                                      | 250              | 65        |
| PPy@Nano-SiO <sub>2</sub> /C                                              | 2023 | <i>Streblus asper</i> leaf | ~23%                  | 76 (0.1C)<br>228 (0.3C)<br>758 (1.0C) | 927<br>756<br>441                        | 10<br>350<br>500 | This work |

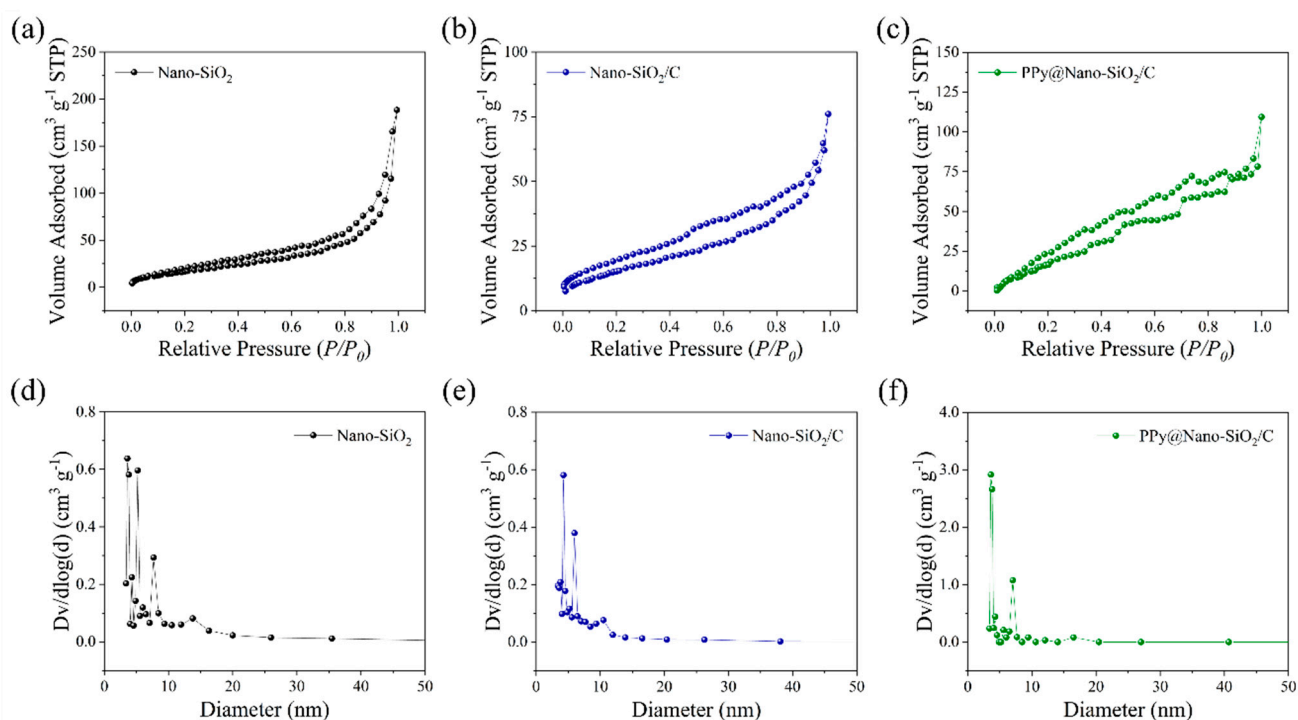

**Figure S1.** BET analysis of the nitrogen adsorption-desorption isotherm corresponding pore-size distribution curves inset: (a,d) Nano-SiO<sub>2</sub>, (b,e) Nano-SiO<sub>2</sub>/C, and (c,f) PPy@Nano-SiO<sub>2</sub>/C.

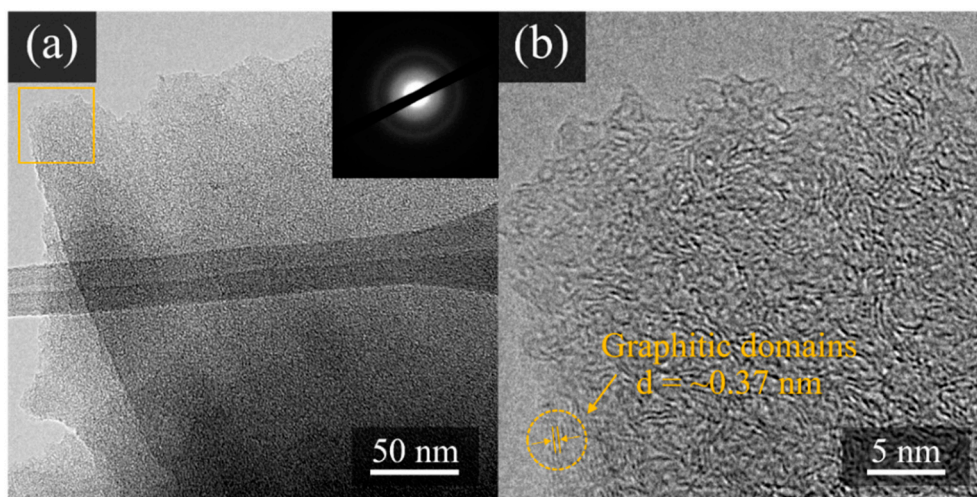

**Figure S2.** (a) TEM image with SAED pattern inset and (b) HRTEM image with lattice view at carbon sheet of Nano-SiO<sub>2</sub>/C nanocomposite

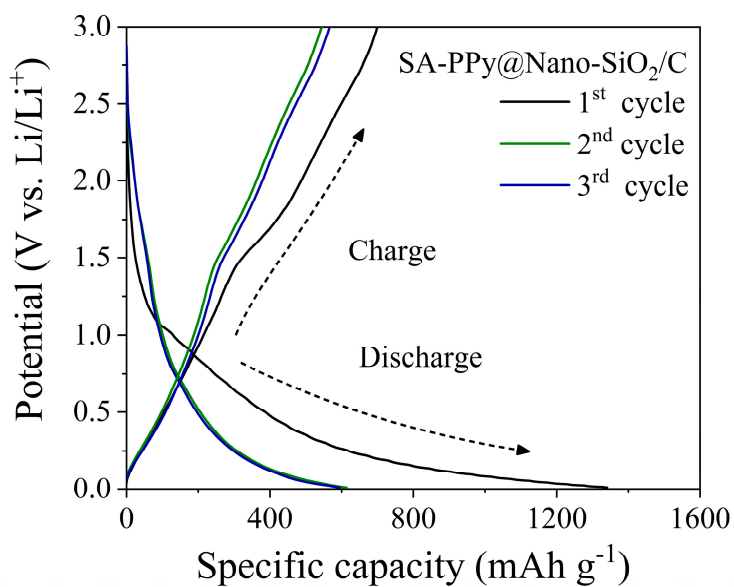

**Figure S3.** the galvanostatic charge–discharge (GCD) profiles at the first three cycles of the fabricated SA-PPy@Nano-SiO<sub>2</sub>/C electrode

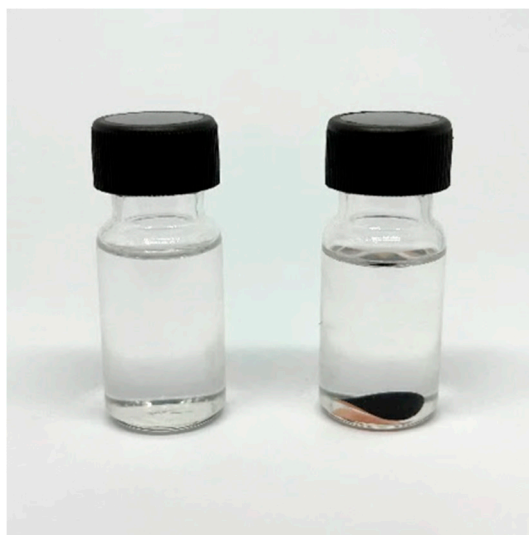

**Figure S4.** The longevity verification experiment in a 1 M LiPF<sub>6</sub> electrolyte with/without the prepared electrode after 60 days
